# Supplementary material for: Anatomy of a Transformation: A Systematic Effort to Reduce Mechanical Restraints at a State Psychiatric Hospital
Source: Atypon-hosted journal article supplement (doi:10.1176/appi.ps.201300247), 2014-08-15
Supplement: 1277_ds001.pdf [file 1277_ds001.pdf]

Table 1. Descriptive Information by Phase – Acute Adult Unit

|                                                | Baseline<br>N =577 | Phase I<br>N =1250 | Phase II<br>N =1083 |
|------------------------------------------------|--------------------|--------------------|---------------------|
| Age ( $\bar{X}$ , SD)<br>(12.77)               | 37.37 (12.63)      | 38.27 (12.73)      | 38.63               |
| Bed Days of Care ( $\bar{X}$ , SD)<br>(47.74)  | 27.90 (40.72)      | 31.17 (43.98)      | 38.11               |
| Sex (% Male)                                   | 56                 | 63                 | 61                  |
| Race (%)                                       |                    |                    |                     |
| White                                          | 42                 | 47                 | 45                  |
| African American                               | 52                 | 48                 | 48                  |
| Married (%)                                    | 10                 | 10                 | 10                  |
| Diagnoses (%)                                  |                    |                    |                     |
| Schizophrenia and Other<br>Psychotic Disorders | 45                 | 46                 | 48                  |
| Bipolar                                        | 13                 | 8                  | 11                  |
| Unipolar Depression                            | 11                 | 13                 | 11                  |
| Substance Use                                  | 13                 | 16                 | 13                  |
| Other Mood/Anxiety                             | 5                  | 7                  | 8                   |
| Impulse Control                                | 3                  | 1                  | 1                   |
| Personality                                    | 3                  | 1                  | 2                   |
| Cognitive-related                              | 2                  | 3                  | 2                   |

*Note.* Although a single individual may have entered the hospital multiple times during the study period, demographic data was collected only on all unique entries (participant) for each unit by phase. N = Number of unique entries (persons) to unit during phase; Baseline = 365 days; Phase I = 365 days; Phase II = 334 days; Bed days of care = Average number of days persons were on the unit during phase; Age = Age on first day of exposure during phase; Schizophrenia and Other Psychotic Disorders included all psychotic-related and delusional disorders; Cognitive-related = dementia disorders, amnesias, neurological conditions, mental retardation and mental disorders from brain injury.

Table 2. Descriptive Information by Phase – Community Transitions Unit

|                                                | Baseline<br>N =95 | Phase I<br>N =118 | Phase II<br>N =121 |
|------------------------------------------------|-------------------|-------------------|--------------------|
| Age ( $\bar{X}$ , SD)<br>(12.24)               | 37.28 (11.76)     | 37.89 (12.86)     | 37.93              |
| Bed Days of Care ( $\bar{X}$ , SD)<br>(120.07) | 226.03 (112.74)   | 201.97 (108.86)   | 253.02             |
| Sex (% Male)                                   | 61                | 59                | 64                 |
| Race (%)                                       |                   |                   |                    |
| White                                          | 38                | 39                | 46                 |
| African American                               | 54                | 53                | 48                 |
| Married (%)                                    | 7                 | 4                 | 4                  |
| Diagnoses (%)                                  |                   |                   |                    |
| Schizophrenia and Other<br>Psychotic Disorders | 85                | 82                | 86                 |
| Bipolar Disorder                               | 6                 | 8                 | 6                  |
| Unipolar Depression                            | 3                 | 5                 | 3                  |
| Substance Use                                  | 1                 | 1                 | 1                  |
| Personality                                    | 2                 | 0                 | 0                  |
| Cognitive-related                              | 2                 | 2                 | 2                  |
| Other Mood/Adjustment                          | 0                 | 2                 | 2                  |
| Impulse Control                                | 0                 | 1                 | 1                  |

Note. Although a single individual may have entered the hospital multiple times during the study period, demographic data was collected only on all unique entries (participant) for each unit by phase. N = Number of unique entries (persons) on the service unit; Baseline = 365 days; Phase I = 334 days; Phase II = 365 days; Bed days of care = Average number of days on the unit during phase; Age = Age on first day of exposure during phase; Schizophrenia and Other Psychotic Disorders included all psychotic-related and delusional disorders; Cognitive-related = dementia disorders, amnesias, neurological conditions, mental retardation and mental disorder from brain injury.

Table 3. Total number of episodes by Intervention Phase and Hospital Unit

|                    | Baseline | Phase I | Phase II |
|--------------------|----------|---------|----------|
| AAU                |          |         |          |
| Mechanical         | 157      | 113     | 6        |
| Seclusion          | 165      | 278     | 196      |
| Manual Holds       | 576      | 1039    | 922      |
| PRNs for Agitation | 4543     | 6798    | 6057     |
| Assaults           | 520      | 780     | 687      |
| Injuries           | 23       | 14      | 8        |
| CTU                |          |         |          |
| Mechanical         | 19       | 3       | 0        |
| Seclusion          | 15       | 37      | 45       |
| Manual Holds       | 127      | 145     | 205      |
| PRNs for Agitation | 507      | 927     | 1228     |
| Assaults           | 186      | 109     | 129      |
| Injuries           | 11       | 7       | 1        |

Note. This table reports the actual number of events and does not consider the number of consumers present on the service units (that is, it is not the incident rate for the variables). Due to a hospital merger that occurred around the start of phase I the number of consumers greatly increased, particularly on AAU. See Table 1 in the printed manuscript for data on the incident rates for all variables other than injuries. PRNs=*pro re nata* (when necessary) – total number of administrations; Assaults = Total number of assaults on patient, staff, or property; Injuries = Total number of injuries reported on staff or patients from assaults or containment procedures.
